# Supplementary material
Source: PubMed Central journal article supplement (PMC3536076)
Supplement: AEM.02358-12_zam999103950so1.pdf [file AEM.02358-12_zam999103950so1.pdf]

**TAB. S1: Oligonucleotides used in the present study**

| <b>Oligonucleotides</b>    |                                                                                  |            |
|----------------------------|----------------------------------------------------------------------------------|------------|
| <i>vdh_for_RBS_NdeI</i>    | 5'-AAAACATATGAAACCTCGCGCATCAGGAG-3';<br><i>NdeI</i> -site underlined, RBS italic | This study |
| <i>vdh_rev_XhoI</i>        | 5'AAA <u>ACTCGAGAG</u> AACTGGCGCTGGTGCTT<br>CGT-3'; <i>XhoI</i> -site underlined | This study |
| <i>vdh_rev_nostop_XhoI</i> | 5'-AAA <u>ACTCGAGGA</u> ACGGGTAGCCGGCGA<br>CGT-3'; <i>XhoI</i> -site underlined  | This study |
| <i>vdhLF_for3</i>          | 5'-TCGTA <u>CTTCGCGGT</u> GATCTCGTGG-3'                                          | This study |
| <i>vdhLF_rev_KmR</i>       | 5'-GACGAGTTCTTCTGACGCGCGGGGG-3'                                                  | This study |
| <i>vdhRF_for_PromKmR</i>   | 5'-CCAGCTGGCAATTCCTGTCACTCCTGATGC-3'                                             | This study |
| <i>vdhRF_rev3</i>          | 5'-TTGCAGTCCTTTGTAGAGCGACACG-3'                                                  | This study |
| <i>KmR_rev_vdhLF</i>       | 5'-CGCCCCCGCCGCGGTCAGAAGAACTC<br>GTC-3'                                          | This study |
| <i>PromKmR_for_vdhRF</i>   | 5'-GCATCAGGAGTGACAGGAATTGCCAGCTGG-3'                                             | This study |
| <i>vdhLF_for_diag</i>      | 5'-GAAAGCCTGCTCAACGACGC-3'                                                       | This study |
| <i>vdhRF_rev2</i>          | 5'-AGGTGGACGTGGAACATCC-3'                                                        | This study |
| <i>pRLE6for2</i>           | 5'-TCACCTTGCTCCTGCCGAGA-3'                                                       | This study |
