# Supplementary material
Source: PubMed Central journal article supplement (PMC3536076)
Supplement: AEM.02358-12_zam999103950so2.pdf [file AEM.02358-12_zam999103950so2.pdf]

|            |     |                     |                     |                     |                     |                     |                     |
|------------|-----|---------------------|---------------------|---------------------|---------------------|---------------------|---------------------|
| ATCC 39116 | 1   | V S F L D D E K W T | G R V F T G S W E R | A A G G D A A V I E | P A T G D E L G R V | G I A S P Q D L A A | S A A K A A E A Q R |
| HR199      | 1   | -- M F H V P L L I  | G --- G K P C S A   | S D E R T F E R R S | P L T G E V V S R V | A A A S L E D A D A | A V A A A Q A A F P |
| AN103      | 1   | -- M L D V P L L I  | G --- G Q S C P A   | R D G R T F E R R N | P V T G E L V S R V | A A A T L E D A D A | A V A A A Q A A F P |
| WCS358     | 1   | M P I F E V P L L I | G --- G M A R A A   | S D G G T F E R R H | P V S G D L V S L V | C R R H P G R A D A | A V E A A Q A A F P |
| KT2440     | 1   | -- M L Q V P L L I  | G --- G Q S R P A   | S D G R T F E R C N | P V T G E V V S Q A | A A A T L A D A D A | A V A A A S A A F P |
| SYK-6      | 1   | -- M D S A R I A    | P --- D Q E R --    | - D R M E F T R L N | P M T G E V A S S A | P A L K A G D I P A | I A R K A R E G F T |
|            |     |                     |                     |                     |                     |                     |                     |
| ATCC 39116 | 61  | A W A A T S F Q E R | A A V L R R A G D L | W Q Q H A A E L K D | W L I R E S G S I P | G K A D F E L H V A | A Q E C Y E A A A L |
| HR199      | 56  | E W A A L A P S E R | R A R L L R A A D L | L E D R S S E F T - | A A A S E T G A A G | N W Y G F N V Y L A | A G M L R E A A A M |
| AN103      | 56  | A W A A L A P N E R | R S R L L K A A E Q | L Q A R S G E F I - | E A A G E T G A M A | N W Y G F N V R L A | A N M L R E A A S M |
| WCS358     | 57  | A W A A L G P G D G | R A R L L K A A D A | L D A R R D E F L - | A M A E E T G A K A | N W Y G F N V M L A | A N I L R E A A S M |
| KT2440     | 56  | A W A A L A P G E R | R S R L L A G A D L | L Q A R A A E F I - | A A A G E T G A M A | N W Y G F N V K L A | A N M L R E A A A M |
| SYK-6      | 52  | A W S V M G P N A R | R A V L M K A A T A | L E A R A D A F V D | A M M G E T G A T K | G W A L F N L G L A | A S M V R E A A A L |
|            |     |                     |                     |                     |                     |                     |                     |
| ATCC 39116 | 121 | P S H P T G E V L P | S E A P - R L S M A | R R V P A G V V G V | I A P F N A P L I L | S I R S V A P A L A | L G N S V V L K P D |
| HR199      | 115 | T T Q I Q G D V I P | S N V P G S F A M A | V R Q P C G V V L G | I A P W N A P V I L | G V R A V A M P L A | C G N T V V L K S - |
| AN103      | 115 | T T Q V N G E V I P | S D V P G S F A M A | L R Q P C G V V L G | I A P W N A P V I L | A T R A I A M P L A | C G N T V V L K A - |
| WCS358     | 116 | T T Q D T G R V I P | S D V P G S F A M A | L R Q P C G V V L G | I A P W N A P V I L | G H I A I A M P L - | -- G R I V S Q G -  |
| KT2440     | 115 | T T Q I T G E V I P | S D V P G S F A M A | L R A P C G V V L G | I A P W N A P V I L | A T R A I A M P L A | C G N T V V L K A - |
| SYK-6      | 112 | T T Q I N G E V I P | S D K P G C L A M A | L R E P V G V I L G | I A P W N A P I I L | G V R A I A V P L A | C G N S V I L K A - |
|            |     |                     |                     |                     |                     |                     |                     |
| ATCC 39116 | 180 | P R T A V C G G V A | L A R V F E E A G L | P A G V L H V L P G | G P D - - - V G A   | A L V E D K H V R V | I S F T G S T A A G |
| HR199      | 174 | S E L S P F T H R L | I G Q V L H D A G L | G D G V V N V I S N | A P Q D A P A V V E | R L I A N P A V R R | V N F T G S T H V G |
| AN103      | 174 | S E L S P A V H R L | I G Q V L Q D A G L | G D G V V N V I S N | A P A D A A Q I V E | R L I A N P A V R R | V N F T G S T H V G |
| WCS358     | 171 | L R S Q P G G A W P | D R S G I A G G R F | G D G V V N V I C N | A P H D A P A V V E | R L I A H P A V R R | V N F T G S T H V G |
| KT2440     | 174 | S E L S P A V H R L | I G Q V L H D A G I | G D G V V N V I S N | A P Q D A P A I V E | R L I A N P A V R R | V N F T G S T H V G |
| SYK-6      | 171 | S E T C P R T H A L | I I E A F A D A G F | P E G V V N V V T N | A P A D A G E V V G | A L I D A P E V K R | I N F T G S T G V G |
|            |     |                     |                     |                     |                     |                     |                     |
| ATCC 39116 | 236 | R A V G E S A G R H | L K R A H L E L G G | N S A L I V L D D A | D L E Q A M S A A A | W G S F F H Q G Q I | C M T T G R H L V H |
| HR199      | 234 | R I I G E L S A R H | L K P A V L E L G G | K A P F L V L D D A | D L D A A V E A A A | F G A Y F N Q G Q I | C M S T E R L I V T |
| AN103      | 234 | R I V G E L S A R H | L K P A L L E L G G | K A P L L V L D D A | D L E A A V Q A A A | F G A Y F N Q G Q I | C M S T E R L I V D |
| WCS358     | 231 | R I V G Q L A A R H | L K P A V L E L G G | K A P F L V L A D A | D L E A A V D A A A | F P A Y F N Q G Q I | C M S T E R L I V D |
| KT2440     | 234 | R I V G E L A A R H | L K P A L L E L G G | K A P L L V L D D A | D L D A T V E A A A | F G A Y F N Q G Q I | C M S T E R L V V D |
| SYK-6      | 231 | K I I A K R A A E H | L K P V L L E L G G | K A P L I V L E D A | D L D E A V K A A A | F G A F M N Q G Q I | C M S T E R I I V V |
|            |     |                     |                     |                     |                     |                     |                     |
| ATCC 39116 | 296 | A S L Y D E Y V D R | L A D K A S H L P V | G N P F T E C V A L | G P I I D A K Q R D | K I H G L V T S S V | D A G A K V A A G G |
| HR199      | 294 | A - V A D A F V E K | L A R K V A T L R A | G D P N D P Q S V L | G S L I D A N A G Q | R I Q V L V D D A L | A K G A R Q V V G G |
| AN103      | 294 | A K V A D A F V A Q | L A A K V E T L R A | G D P A D P E S V L | G S L V D A S A G T | R I K A L I D D A V | A K G A R L V I G G |
| WCS358     | 291 | Q A V A D E F V A K | L G E K V R R L R A | A D P S Q P D A P L | G S L I D A G A G E | R I Q A L V D D A V | G K G A T L V A G G |
| KT2440     | 294 | S C I A D A F V D K | L A V K I A G L R A | G D P Q A S T S V L | G S L V S A A A G E | R I K A L I D D A V | A K G A R L V S G G |
| SYK-6      | 291 | D A V A D E F A A R | F K A K V S A M P V | G D P R Q G S T P L | G A V V D T K T V A | H C L S L I E D A L | G K G A E Q L T G G |
|            |     |                     |                     |                     |                     |                     |                     |
| ATCC 39116 | 355 | - T Y E D L F Y R A | T V L A G A G P S V | P A Y D Q E V F G P | V A P V A K F T S L | D - E A A K L A S E | S E Y G L S L G I I |
| HR199      | 353 | G L D G S I M Q P - | M L L D Q V T E E M | R L Y R E E S F G P | V A V V L R G D G D | E - E L L R L A N D | S E F G L S A A I F |
| AN103      | 354 | Q L E G S I L Q P - | T L L D G V D A S M | R L Y R E E S F G P | V A V V L R G E G E | E - A L L Q L A N D | S E F G L S A A I F |
| WCS358     | 351 | E R T G S V M H R - | Y C L T T S M R A L | K L Y R E E S F G P | V A V V L R A S G H | E G A A G P L A N D | S E F G L S A A I F |
| KT2440     | 354 | Q L E G S I L Q P - | T L L D N V D A S M | R L Y R E E S F G P | V A V V L R A E G D | E - A L L Q L A N D | S E F G L S A A I F |
| SYK-6      | 351 | E T T Q N V L M P A | H V I D R V T P D M | K L F R D E S F G P | V V G I I R A R D A | E - H A I E L A N D | T E Y G L S A S V F |
|            |     |                     |                     |                     |                     |                     |                     |
| ATCC 39116 | 414 | T A D V A K G L A L | A D R I P T G I A H | I N D Q T V N D E A | L A P F G G V F D S | G T G S R F G G P A | A N I E A F T E T R |
| HR199      | 411 | S R D V S R A M E L | A Q R V D S G I C H | I N G P T V H D E A | Q M P F G G V K S S | G Y G - S F G S R A | S - I E H F T Q L R |
| AN103      | 412 | S R D T G R A L A L | A Q R V E S G I C H | I N G P T V H D E A | Q M P F G G V K S S | G Y G - S F G G K A | S - I E H F T Q L R |
| WCS358     | 410 | S R D T Q R A L A L | A Q R L E S G I C H | I N G P T V H D E A | T M P F G G V K A S | G F G - R F G R T A | A - I D A F T Q L R |
| KT2440     | 412 | S R D T S R A L A L | A Q R V E S G I C H | I N G P T V H D E A | Q M P F G G V K S S | G Y G - S F G S R T | A - I D Q F T Q L R |
| SYK-6      | 410 | T R D T A K G L S V | A R R I E S G I C H | V N G P T V H D E A | Q M P F G G V K A S | G Y G - R F G G K A | G - I D S F T E L R |
|            |     |                     |                     |                     |                     |                     |                     |
| ATCC 39116 | 474 | W V T M R G D V A G | Y P F               |                     |                     |                     |                     |
| HR199      | 469 | W L T I Q N G P R H | Y P I               |                     |                     |                     |                     |
| AN103      | 470 | W V T L Q N G P R H | Y P I               |                     |                     |                     |                     |
| WCS358     | 468 | W D S V Q H G A A H | Y P I               |                     |                     |                     |                     |
| KT2440     | 470 | W V T L Q H G P R H | Y P I               |                     |                     |                     |                     |
| SYK-6      | 468 | W I T I E T Q P G H | F P I               |                     |                     |                     |                     |

**FIG. S1. Homology at amino acid level of the putative  $VDH_{ATCC\ 39116}$  of *Amycolatopsis* sp. ATCC 39116 to different enzymes with  $VDH$  activity.** The amino acid sequence of the  $VDH_{ATCC\ 39116}$  of *Amycolatopsis* sp. ATCC 39116 was compared to sequences of a  $VDH$  of *Pseudomonas* sp. HR199 (36); a  $VDH$  of *P. fluorescens* AN103 (12); a  $VDH$  of *P. putida* WCS358 (46); a  $VDH$  of *P. putida* KT2440 (28) and a  $VDH$  of *S. paucimobilis* SYK-6 (22). Identical amino acids are labeled in black, while similar amino acids are shaded in grey. The characteristic motif of aldehyde dehydrogenases with glutamic acid in the catalytic center is underlined in black (amino acids 251 to 258).
